# Supplementary material for: Inducing Social Norms in Laboratory Allocation Choices
Source: Atypon-hosted journal article supplement (doi:10.1287/mnsc.2014.2073), 2015-03-11
Supplement: mnsc.2014.2073-sm-data.zip [file readme.pdf › Schram and Charness data/readme.pdf]

Data files (all excel) are named using the convention ABCsesD, with

A= advice treatment (advice/noadvice)

B= payoff treatment (private/public)

C= type of data (chat/data/qstn)

D= number of the session for combination AB; there are 6 sessions for advice/private; 6 sessions for advice/public; 2 sessions for no-advice/private; 3 sessions for no-advice/public.

The structure of the files (C) is as follows.

**C="Chat"**

Column 1: participant number (only participants in advice groups)

Column 2: (advice) group number

Column 3: chat message

**C="Data"**

Column 1: cubicle identifier

Column 2: participant number (only dictators)

Column 3: group number

Column 4: type (1=dictator)

Column 5: block (always 2, unused in this experiment)

Column 6: round (always 1, one-shot experiment)

Column 7: phase (always 4: phase where dictator makes decision)

Column 8: data identifier (always 90001, unused in this experiment)

Column 9: chosen allocation (1=A, 1=B, 3=C, 4=D, 5=E, 6=F)

**C="qstn"** (responses to post-experimental questionnaire)

Column 1: cubicle identifier

Column 2: participant number (only dictators)

Column 3: group number

Column 4: type (1=dictator (red), 2=green, 3=blue)

Column 5: block (always 15, unused in this experiment)

Column 6: age

Column 7: gender (1=male, 2=female)

Column 8: first year of college

Column 9: field of study (major)

Column 10: has paid job, > 2 days per week (1=no, 2=yes)

Column 11: What ought red to do? (1=A, 1=B, 3=C, 4=D, 5=E, 6=F)

Column 12: If blue were dictator, what ought blue to do? (1=A, 1=B, 3=C, 4=D, 5=E, 6=F)

Column 12: If green were dictator, what ought green to do? (1=A, 1=B, 3=C, 4=D, 5=E, 6=F)
